# Supplementary material for: Structural stabilities, electronic structures, and superconductivity properties of GexS1−x compounds under high pressure
Source: Royal Society of Chemistry journal article supplement (doi:10.1039/d4ta02247e), 2024-01-01
Supplement: d4ta02247e1.pdf [file d4ta02247e1.pdf]

## Supplementary Information

### Structural stabilities, electronic structures, and superconductivity properties of $\text{Ge}_x\text{S}_{1-x}$ compounds under high pressure

Yibo Sun<sup>a</sup>, Bohan Cao<sup>a</sup>, Xinwei Wang<sup>a</sup>, Jiajin Chen<sup>a</sup>, Defang Duan<sup>a</sup>, Fubo Tian<sup>\*a</sup> and Tian Cui<sup>\*b,a</sup>

*a. State Key Laboratory of Superhard Materials, College of Physics, Jilin University, Changchun 130012, China.*

*b. School of Physical Science and Technology, Ningbo University, Ningbo 315211, China.*

\*Corresponding Author Email: tianfb@jlu.edu.cn; cuitian@nbu.edu.cn

## Supporting Figures

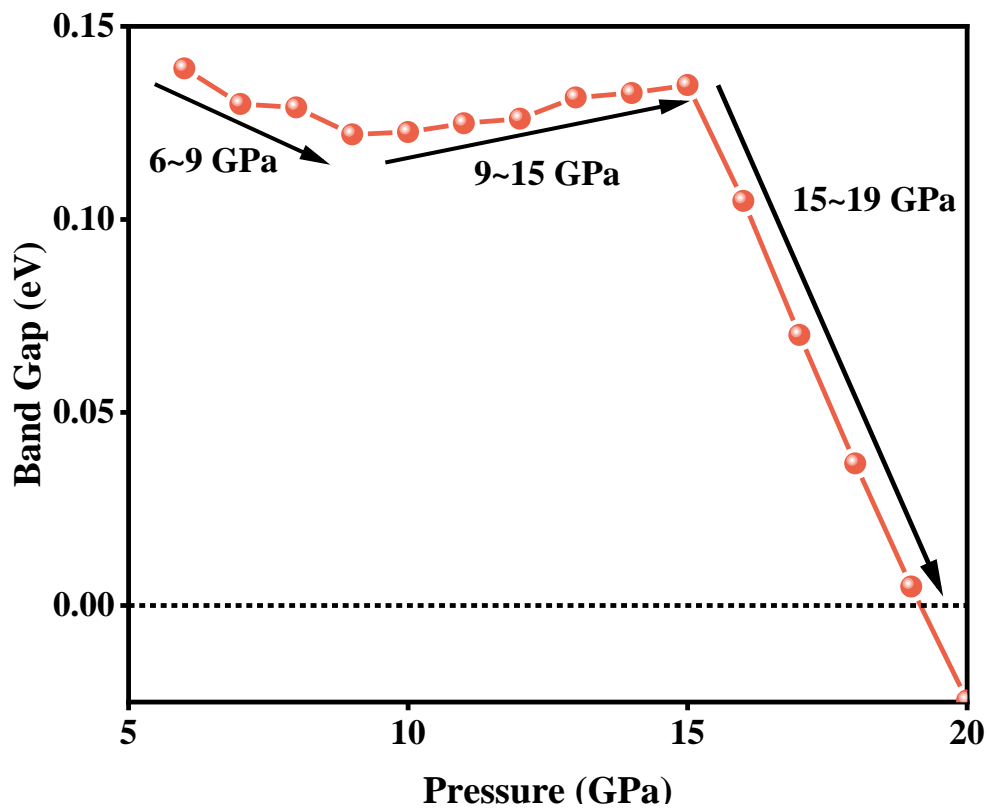

Fig. S1 Band gap changes of *Pnma*-2 GeS within 6~19 GPa.

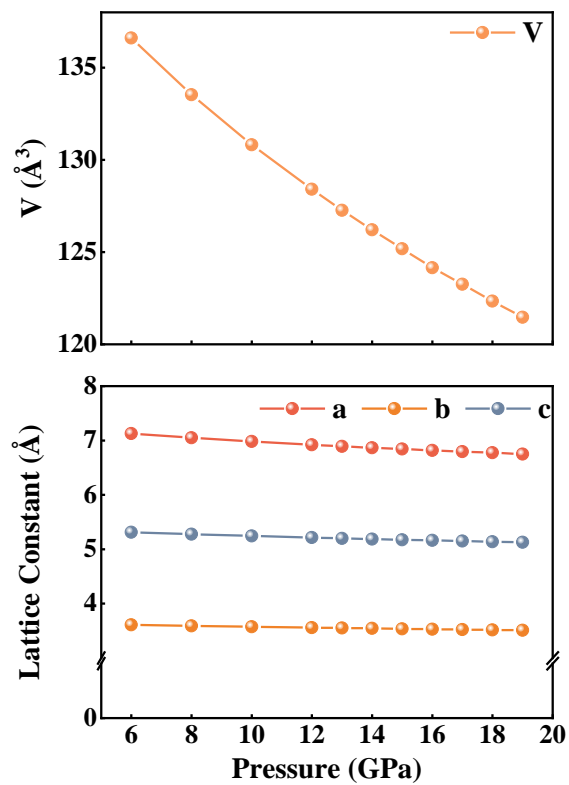

Fig. S2 Parameters of *Pnma*-2 within 6~19 GPa.

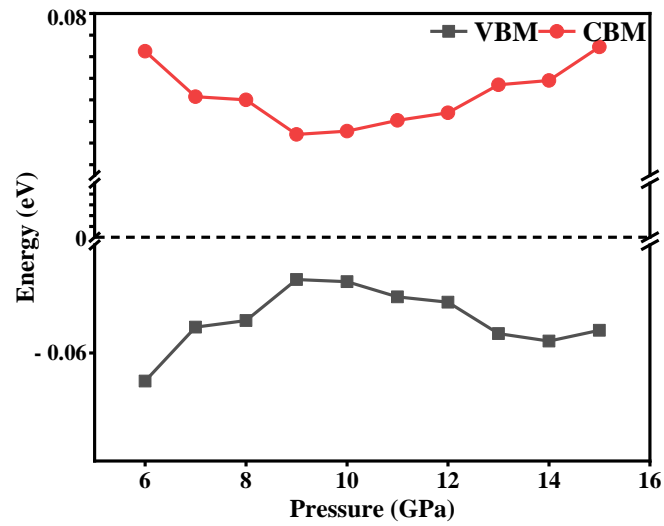

Fig. S3 VBM and CBM shifting within 6~15 GPa.

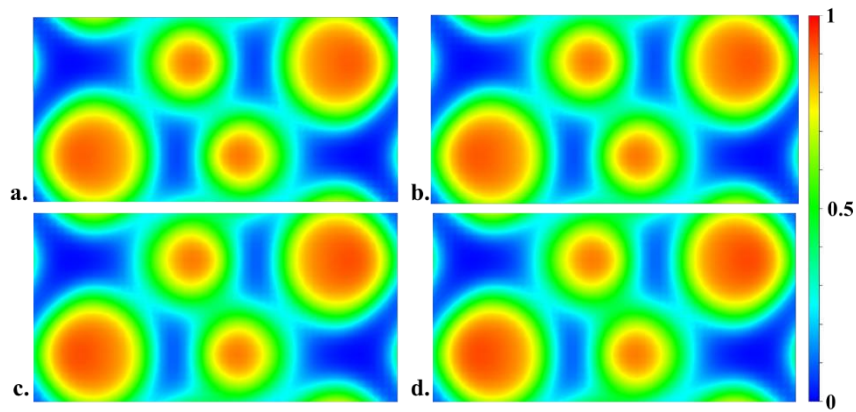

Fig. S4-A ELF of (0 0 1) plane of *Pnma-2* at (a) 6 GPa, (b) 9 GPa, (c) 15 GPa and (d) 19 GPa.

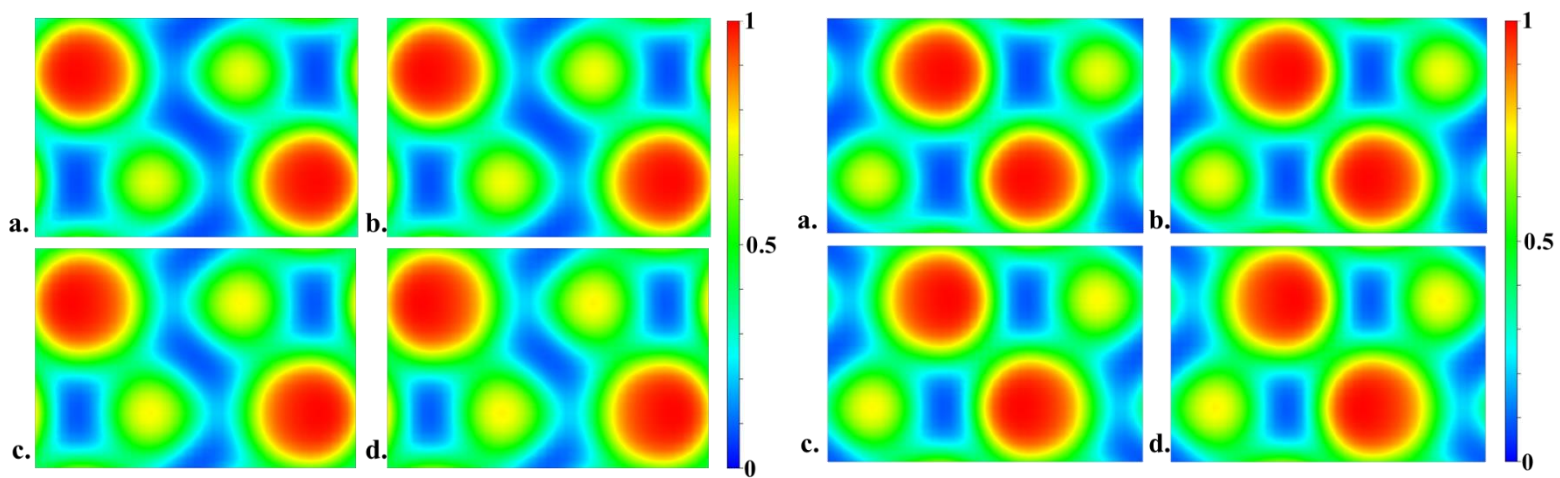

Fig. S4-B ELF of (1 0 0) plane of *Pnma-2* at origin surface and middle sliced space under (a) 6 GPa, (b) 9 GPa, (c) 15 GPa and (d) 19 GPa.

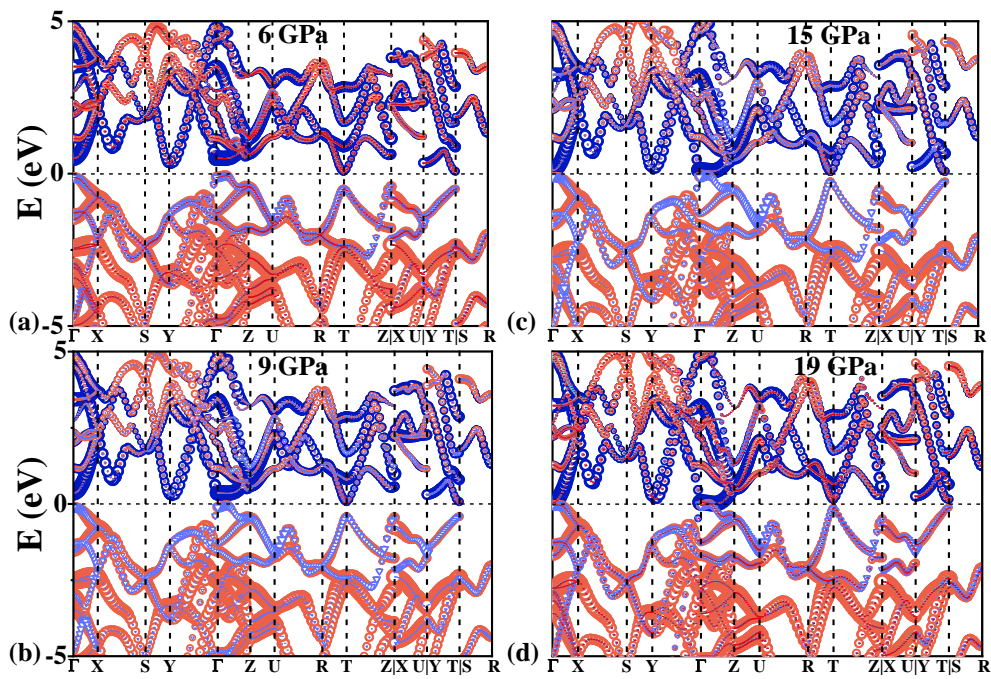

**Fig. S5** Projected band structures of *Pnma*-2 GeS under different pressures. Red for S atoms, blue for Ge atoms, hollow circles for p orbitals, hollow inverted triangles for s orbitals, respectively. Since the contribution from the s-orbital of Ge atoms at VB near the Fermi surface (blue inverted triangles) would be completely obscured by the p-orbital of S atoms (red hollow circles), in order to better observe the variation of the contribution from the s-orbital of Ge atoms, we drew it in the upper layer.

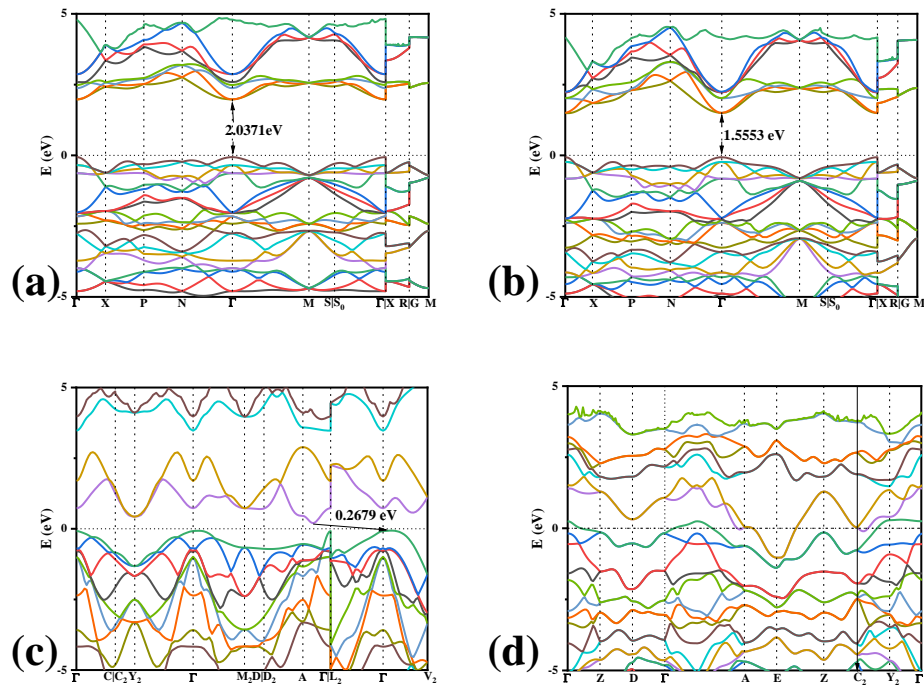

**Fig. S6** Band structures of GeS<sub>2</sub> and GeS<sub>4</sub> under different pressures. Shown as, *I*-42*d* GeS<sub>2</sub> under 0 GPa (a) and 2.8 GPa (b), *C*2/*m* GeS<sub>4</sub> under 2.8 GPa (c), and *P*2<sub>1</sub>/*c* GeS<sub>4</sub> under 0 GPa.

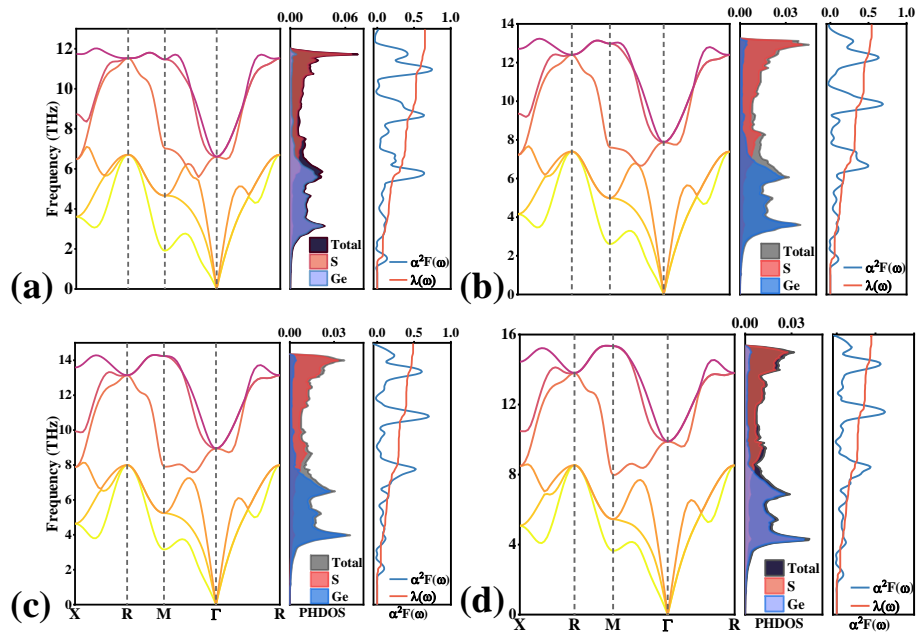

Fig. S7 Phonon, PDOS,  $\lambda$  and  $\alpha^2 F(\omega)$  for  $Pm-3m$  GeS at (a) 60 GPa, (b) 80 GPa, (c) 100 GPa and (d) 120 GPa.

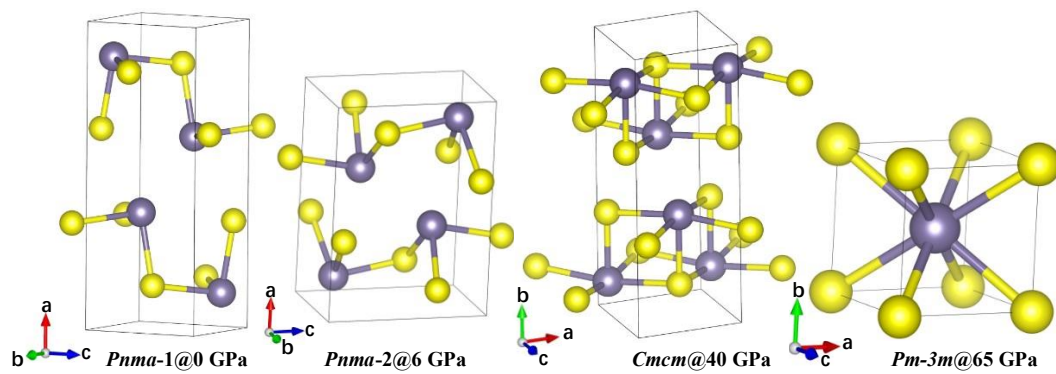

Fig. S8-A Crystal structures of GeS

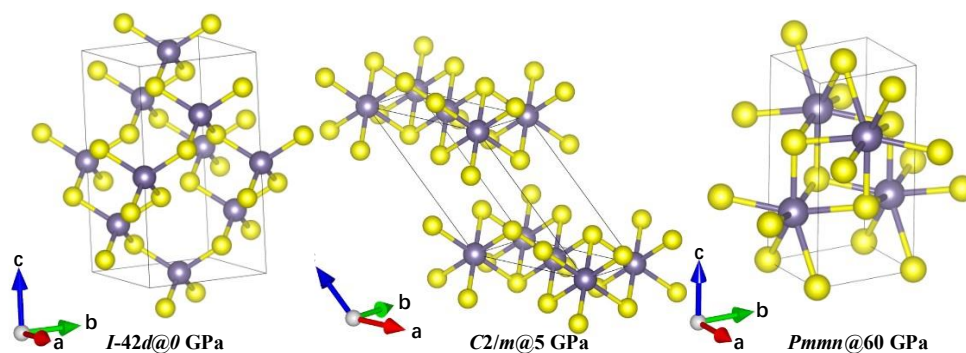

Fig. S8-B Crystal structures of GeS<sub>2</sub>

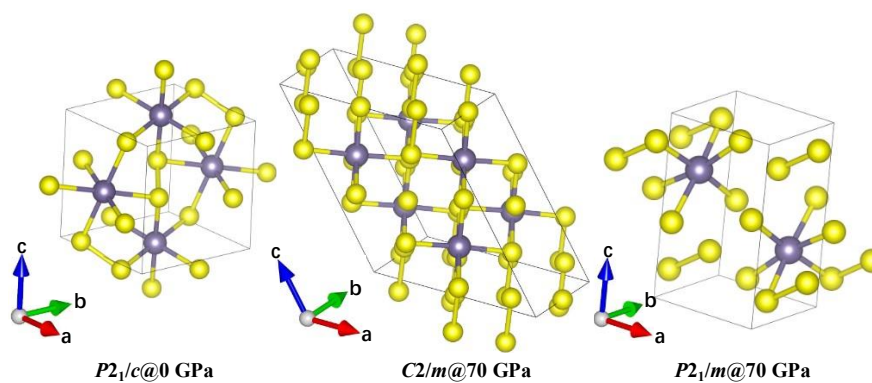

Fig S8-C Crystal structures of GeS<sub>4</sub>
